# Supplementary material for: Two-factor authentication underpins the precision of the piRNA pathway
Source: PubMed Central journal article supplement (PMC11499256; doi:10.1038/s41586-024-07963-3), 2024-09-18
Supplement: 41586_2024_7963_MOESM1_ESM.pdf [file 41586_2024_7963_MOESM1_ESM.pdf]

## Supplementary information

---

# Two-factor authentication underpins the precision of the piRNA pathway

---

In the format provided by the authors and unedited

Whole blots used for Figure 1 d

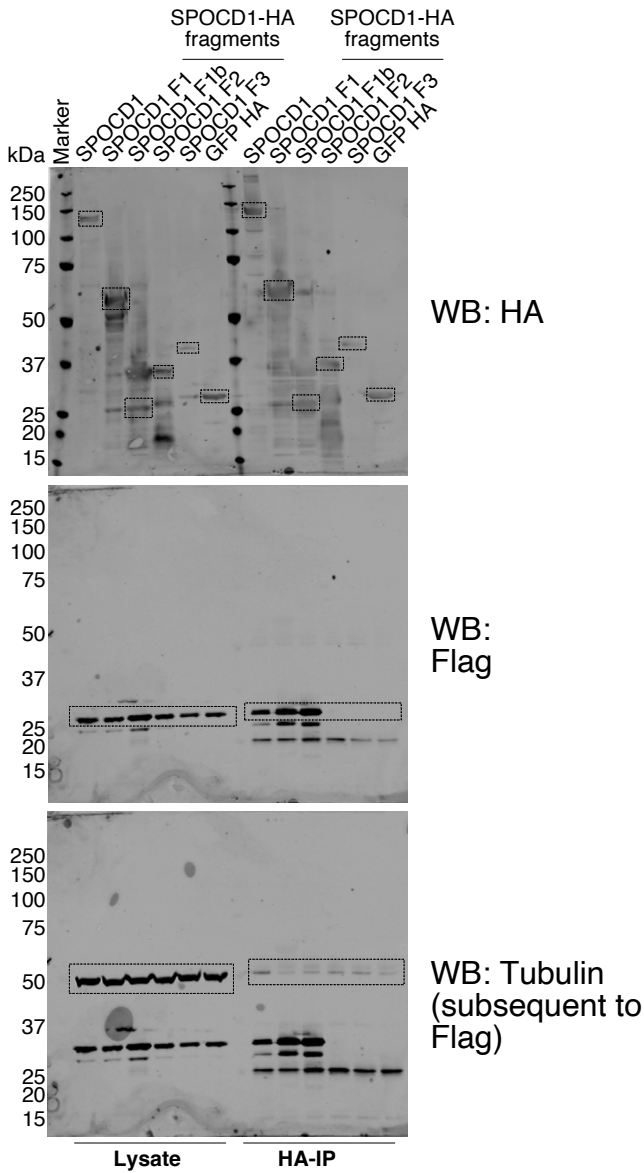

□ indicates cropped imaged shown in figure

Whole blots used for Figure 1 g

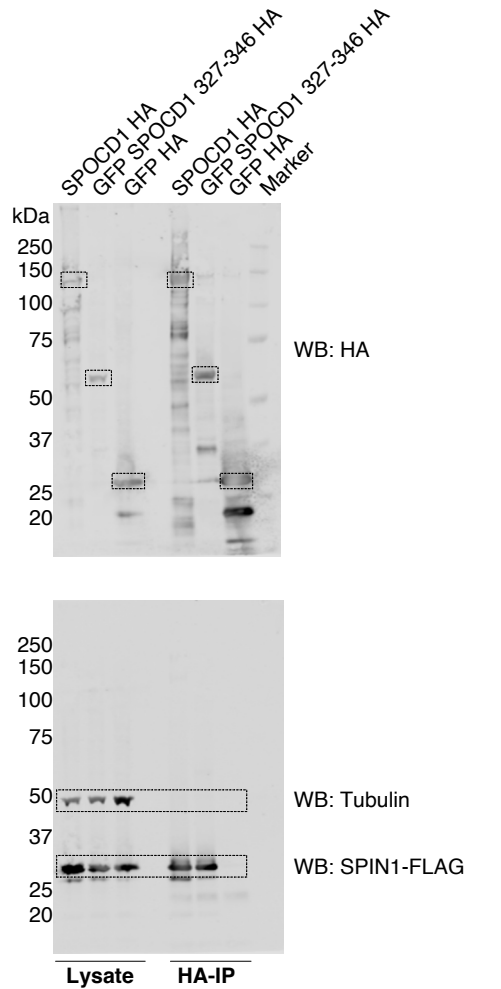

□ indicates cropped imaged shown in figure

Whole blots used for Figure 1 e

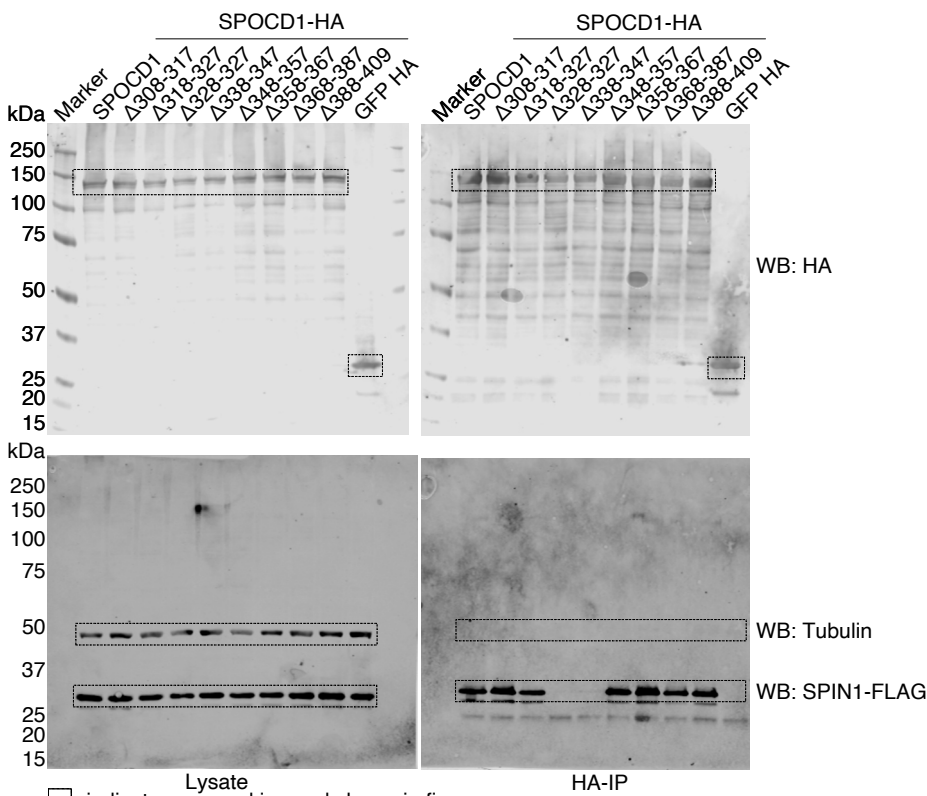

□ indicates cropped imaged shown in figure

Supplemental Data Figure - Whole blot images of western blot figures

Whole blots and gels used for Figure 1 j

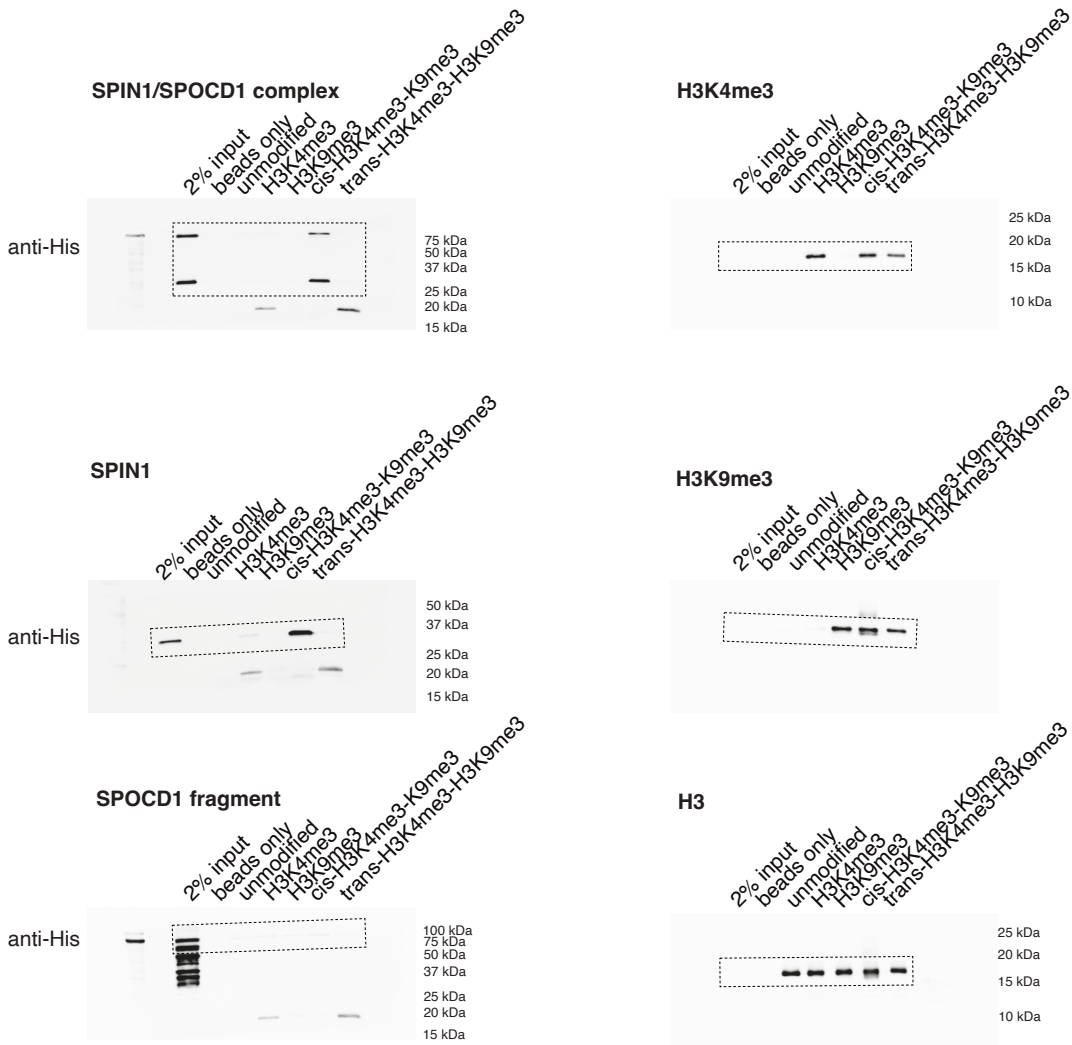

\* 75 kDa marker band cross-reacts with anti-His antibody

☐ indicates cropped image shown in figure

Supplemental Data Figure - Whole blot images of western blot figures

Whole blots used for Figure 4 a

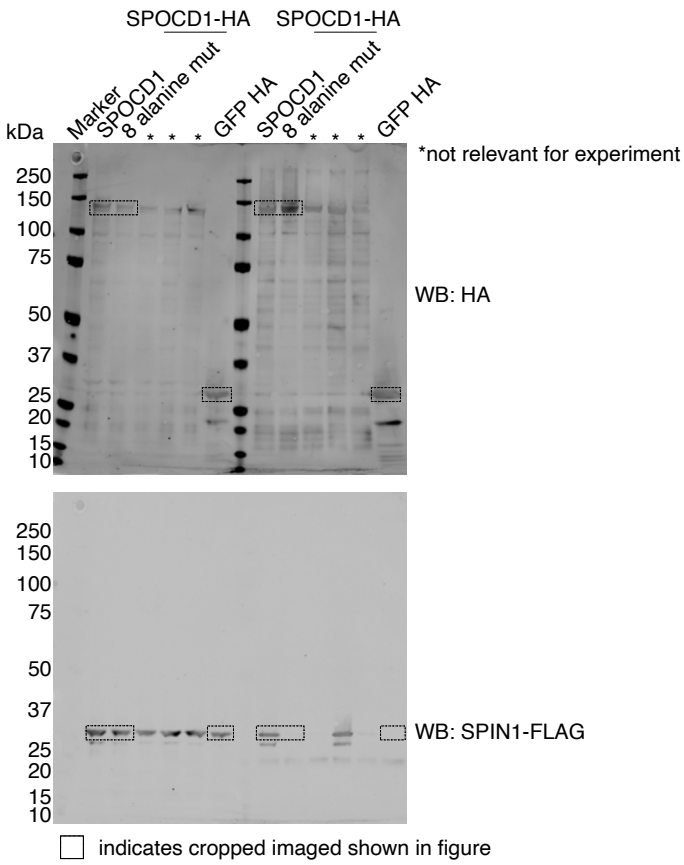

Whole blots used for Extended Data Figure 5 a

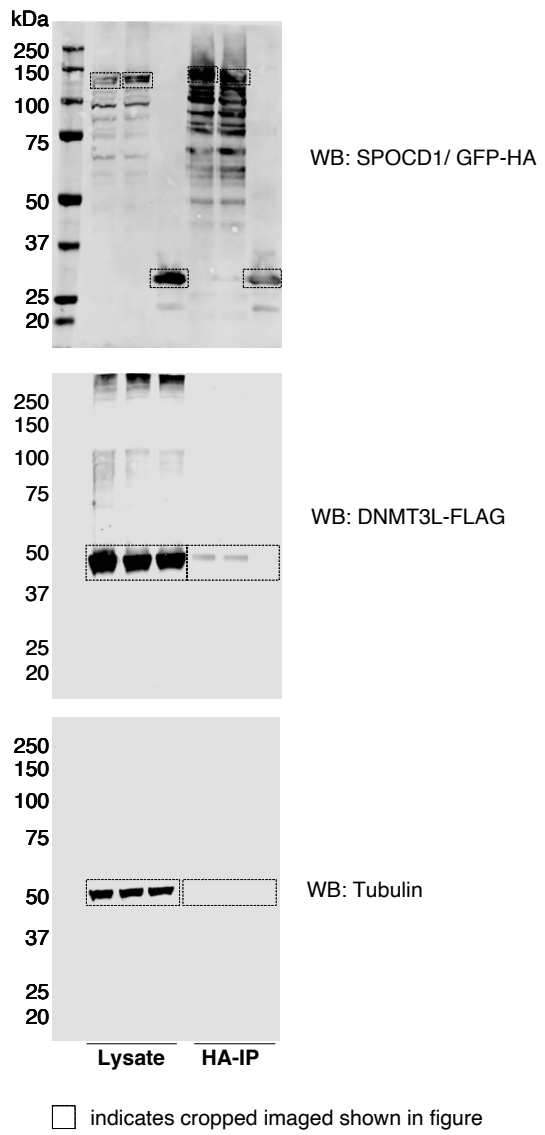

**Supplementary Figure - FACS gating**

**a**

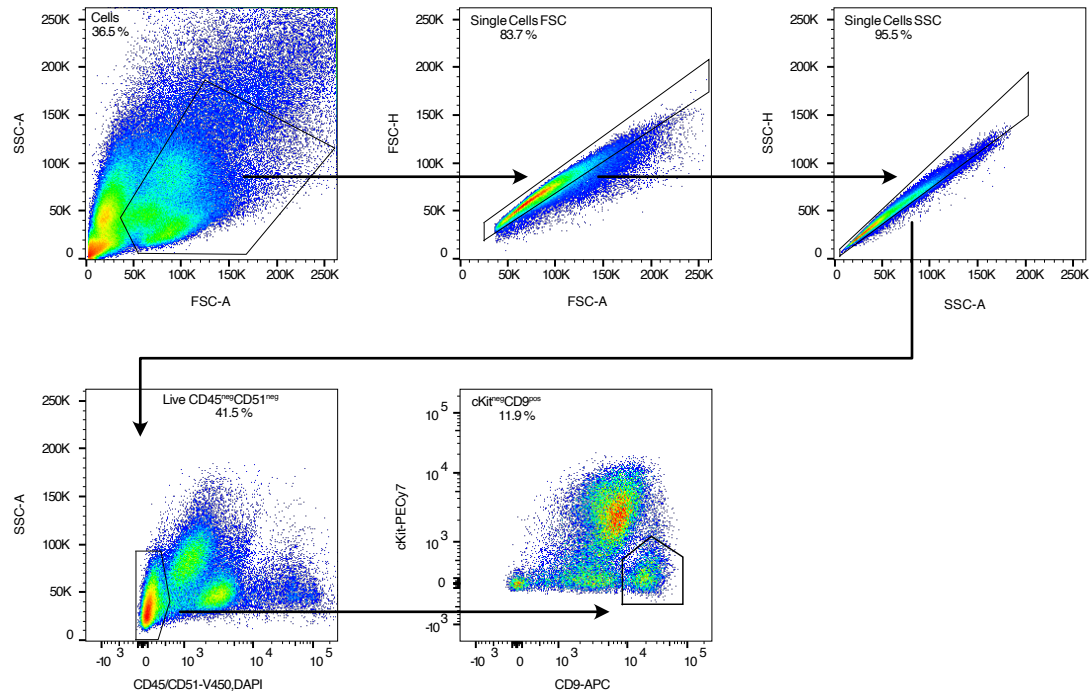

**b**

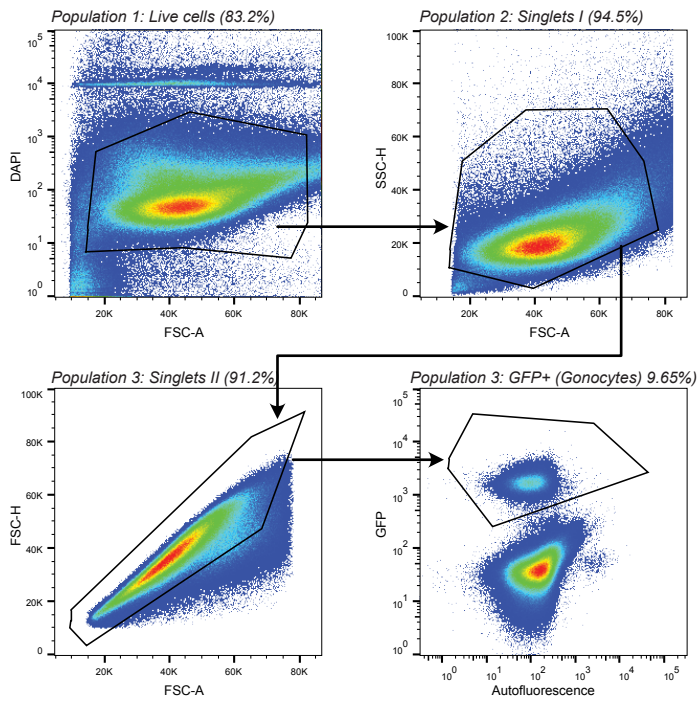

**Supplemental Figure – Gating strategy for sorting P14 spermatogonia and E14.5 gonocytes**

**a**, Gating strategy to sort P14 CD9<sup>+</sup> spermatogonia. **b**, Representative FACS gating strategy to isolate live gonocytes from single cell suspensions of embryonic testes using the Oct4-EGFP reporter (B6;129S4-Pou5f1<sup>tm2Jae/J</sup>).
